# Supplementary material for: Early-Outcome Differences between Acute and Chronic Periprosthetic Joint Infections—A Retrospective Single-Center Study
Source: MDPI journal article supplement (doi:10.3390/antibiotics13030198), 2024-02-20
Supplement: s1 [file s1]

## Diagnostic Process PJI

Suspected PJI

(clinical signs of infection,  
hints in laboratory results,  
hints in imaging, presence  
of fistula)

No antibiotic treatment before sample  
collection (puncture or biopsy) !

Standardised Diagnostics: medical  
history, clinical examination, X-ray in two  
planes, laboratory examination

Screening for  
secondary  
foci

Joint Puncture

Infection not confirmed or punctio sicca

Infection confirmed

(pathogen identified, cell count  
>2000/ $\mu$ l leucocytes, >70%  
granulocytes, histology Krenn type 2  
or 3)

symptoms < 4 weeks

symptoms > 4 weeks

Acute Infection

Chronic Infection

Primary implantation < 4 weeks

Primary implantation > 4 weeks

Early Infection

Acute Late Infection
