# Supplementary material for: Early-Outcome Differences between Acute and Chronic Periprosthetic Joint Infections—A Retrospective Single-Center Study
Source: Antibiotics (Basel). 2024 Feb 20;13(3):198. doi: 10.3390/antibiotics13030198 (PMC10967401; doi:10.3390/antibiotics13030198)
Supplement: Supplementary file 1 [file antibiotics-13-00198-s001.zip]

Archive with 6 entries (6 files):
- S1_fig.pdf
- __MACOSX/._S1_fig.pdf
- S2_fig.pdf
- __MACOSX/._S2_fig.pdf
- S3_fig.pdf
- __MACOSX/._S3_fig.pdf
