# Supplementary figures and images for: Early-Outcome Differences between Acute and Chronic Periprosthetic Joint Infections—A Retrospective Single-Center Study
Source: MDPI journal article supplement (doi:10.3390/antibiotics13030198), 2024-02-20

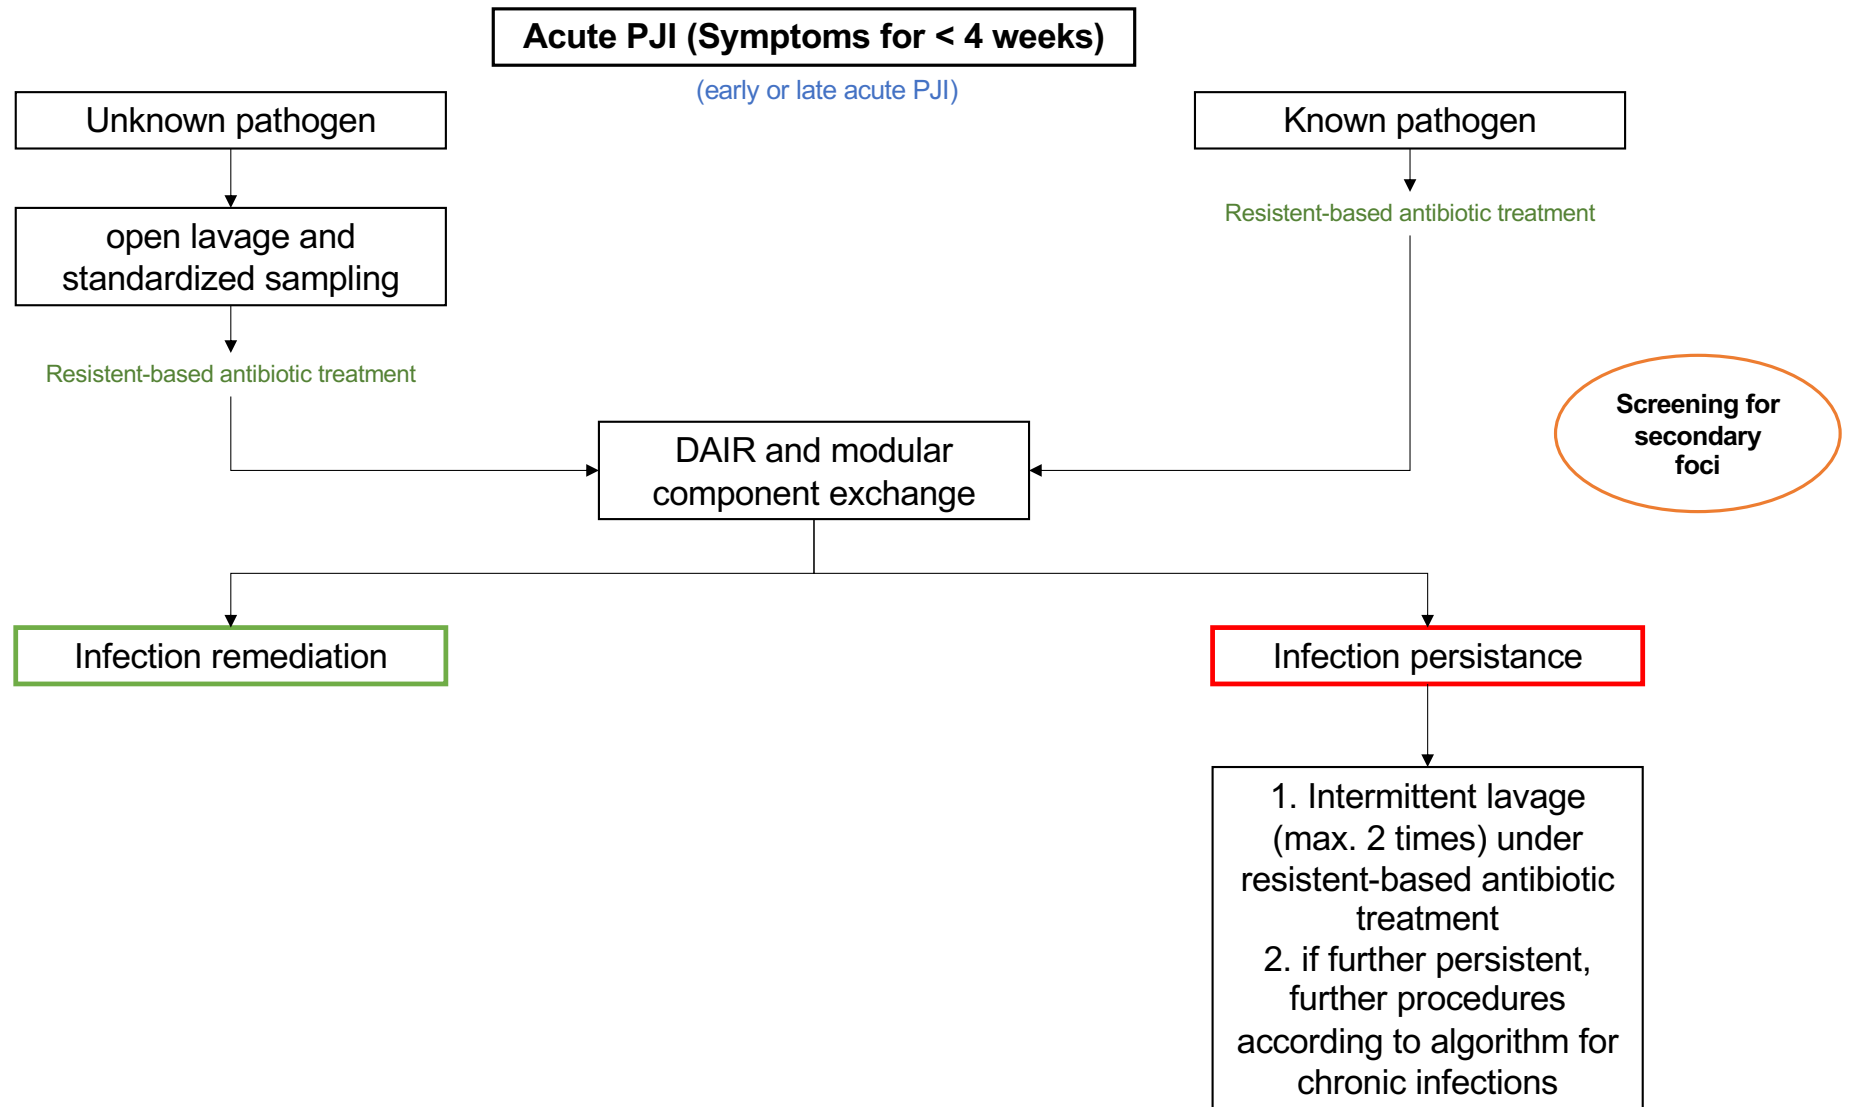

Supplement: s1 [file s1]

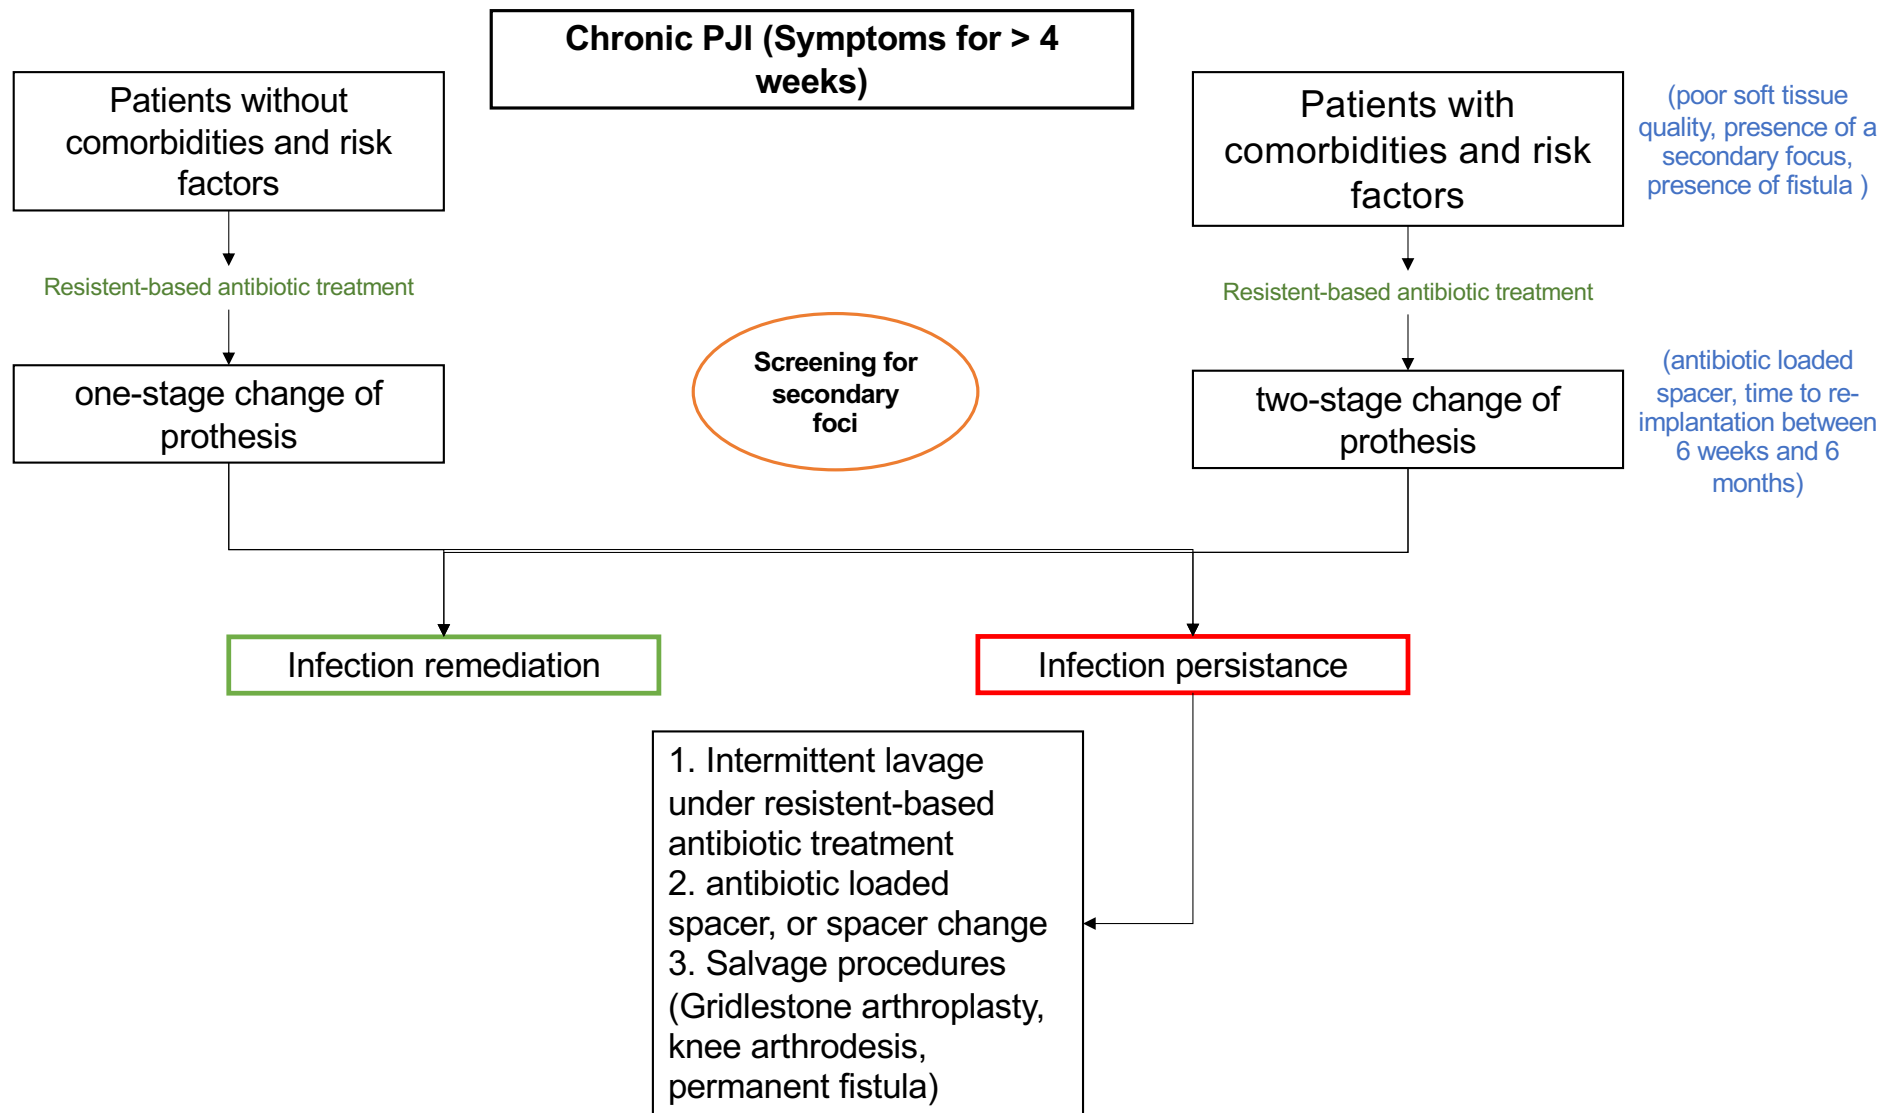

Supplement: s1 [file s1]
